# Supplementary material
Source: publisher site journal article supplement (https://www.dovepress.com/article/280333)
Supplement: Supplementary file 1 [file get_supplementary_file.php]

**Table S1 Information about the sampling city**

| **City** | **Province** | **Location** | **City level** | **GDP/Billion RMB** | **Population** | **District with the highest population density** | **Population of sample district** | **Web of sampling Drug Administration** |
| --- | --- | --- | --- | --- | --- | --- | --- | --- |
| Nanjing | Jiangsu | East | Vice-provincial city | 1273.08 | 8.44 million | Gulou District | 0.93 million | http://amr.nanjing.gov.cn/ |
| Zhuhai | Guangdong | South | prefecture-level city | 291.474 | 1.89 million | Xiangzhou District | 0.94 million | http://scjg.zhuhai.gov.cn/ |
| Qingyang | Gansu | Northwest | prefecture-level city | 70.82 | 2.26 million | Xifeng District | 0.37 million | http://scjg.zgqingyang.gov.cn/ |

**Survey questionnaire**

**Part I Demographic Information**

1. What is your gender?

 Male  Female  Other

2.What is your age？

 20-30  31-40  41-50  51-60  61 or above

3. What is your pharmacist category?

 Licensed TCM Pharmacist  Licensed Pharmacist  Non-licensed pharmacist  Others_____

4. What is your highest qualification?

 Specialized secondary school  High school  Diploma  Undergraduate  Postgraduate  Ph.D.

5. How long have you been worked in the community pharmacy?

 <1 year  1-5 years  6-10 years  11-15 years  16-20 years  21 or above

6. How many hours do you worked in the community pharmacy per week?

 1-16 hours  17-32 hours  33-40 hours  41-48 hours  49 hours or above

7. Which type are you work in?

 Chain pharmacy  Monomer pharmacy  Others

8.Does the pharmacy you worked in sell the medicines for the treatment of COPD?

 Yes  No  Unclear

9. Do you received previous training on COPD management during school education?

 Yes  No  Unclear

10. Do you received training on COPD management during employment?

 Yes  No  Unclear

11. Do you agree with the sentence "pharmacists are responsible for the management of COPD to control the progress of this disease"

 Strongly agree  Agree  Unclear  Disagree  Strongly disagree

**Part II Basic Knowledge Survey of COPD**

12. The risk factors for COPD are:

 Smoking  Pulmonary infections  Air pollution and dust  Allergic reactions

 Hyper parasympathetic regimen

13. COPD-induced lung airflow limitation is reversible.

 Yes  No  Unclear

14. Symptoms of COPD include chronic cough, sputum, dyspnea, chest tightness and so on.

 Yes  No  Unclear

15. If a patient is suspected and has a FEV / FVC <90% from a pulmonary function test, the patient is diagnosed with COPD.

 Yes  No  Unclear

16. The most commonly used international guideline for the treatment of COPD is GOLD.

 Yes  No  Unclear

17. Inhaled drugs are the first choice for maintenance treatment of chronic obstructive pulmonary disease, such as short-acting β2 adrenoceptor agonists (SABAs)

 Yes  No  Unclear

18. Inhaled glucocorticoids are not commonly used in the treatment of COPD due to strong adverse drug reactions.

 Yes  No  Unclear

19. Common adverse reactions to theophylline drugs include nausea, vomiting, diarrhea, food reflux, and headaches.

 Yes  No  Unclear

20. Short-acting bronchodilators commonly used during the acute exacerbation of COPD.

 Yes  No  Unclear

21. Short-term oral glucocorticoids can be used during exacerbations, with the aim of shortening the recovery time and reducing the severity of exacerbations and the risk of early relapses.

 Yes  No  Unclear

22. Other treatments that pharmacists can use to help patients with chronic obstructive pulmonary disease include:

 Assisting patients to quit smoking  Recommending patients to receive flu vaccine

 Encouraging patients to exercise more  Advising patients to reduce salt intake

23. Pulmonary rehabilitation services for patients with COPD can improve shortness of breath and exercise tolerance

 Yes  No  Unclear

24. Do you encounter patients in your daily practice?

 Yes (Please note down the number for per week meeting) _____  No  Unclear

**Table S2 Comparison of education in two different majors**

|  | **Diploma Major (Medicine Analysis Technology)** | **Undergraduate Major (Pharmacy)** |
| --- | --- | --- |
| Foundation Courses | College English, Advanced Mathematics, Medical Physics | College English, Advanced Mathematics, Linear Algebra, Mathematical Statistics, Physics |
| Chemistry Courses | Basic Chemistry, Organic Chemistry, Physical Chemistry,  Biochemistry | Inorganic Chemistry, Analytical Chemistry, Organic Chemistry, Physical Chemistry, Biochemistry and Molecular Biology |
| Pharmacy Courses | Microbiology, Pharmacology, Medicinal Chemistry | Microbiology, Natural Medicinal Chemistry, Medicinal Chemistry,  Pharmacy, Pharmacology, Pharmacology, Pharmacokinetics, Pharmaceutical Analysis |
| Professional Technology Courses | Pharmaceutical preparation technology, pharmaceutical analysis technology,  Traditional Chinese medicine extraction and separation technology,  Traditional Chinese medicine preparation inspection technology,  Drug manufacturing process verification,  Comprehensive Practice and Instrumental Analysis of Drug Production |  |
| Medical Courses | Human Anatomy and Physiology | Clinical pharmacology, cell biology, pathophysiology,  Pharmaceutical Toxicology, Basic Medicine, and Clinical Medicine | |
| Note: Materials were referred and adapted from the website of China Pharmaceutical University (accessed from http://www.cpu.edu.cn/4216/list.htm (accessed on Feb 27, 2020)). | | | |
